# Supplementary material for: Large-scale screening for novel low-affinity extracellular protein interactions
Source: HighWire-hosted journal article supplement (doi:10.1101/gr.7187808), 2008-02-22
Supplement: Figure_S1.pdf [file Figure_S1.pdf]

Figure S1.1

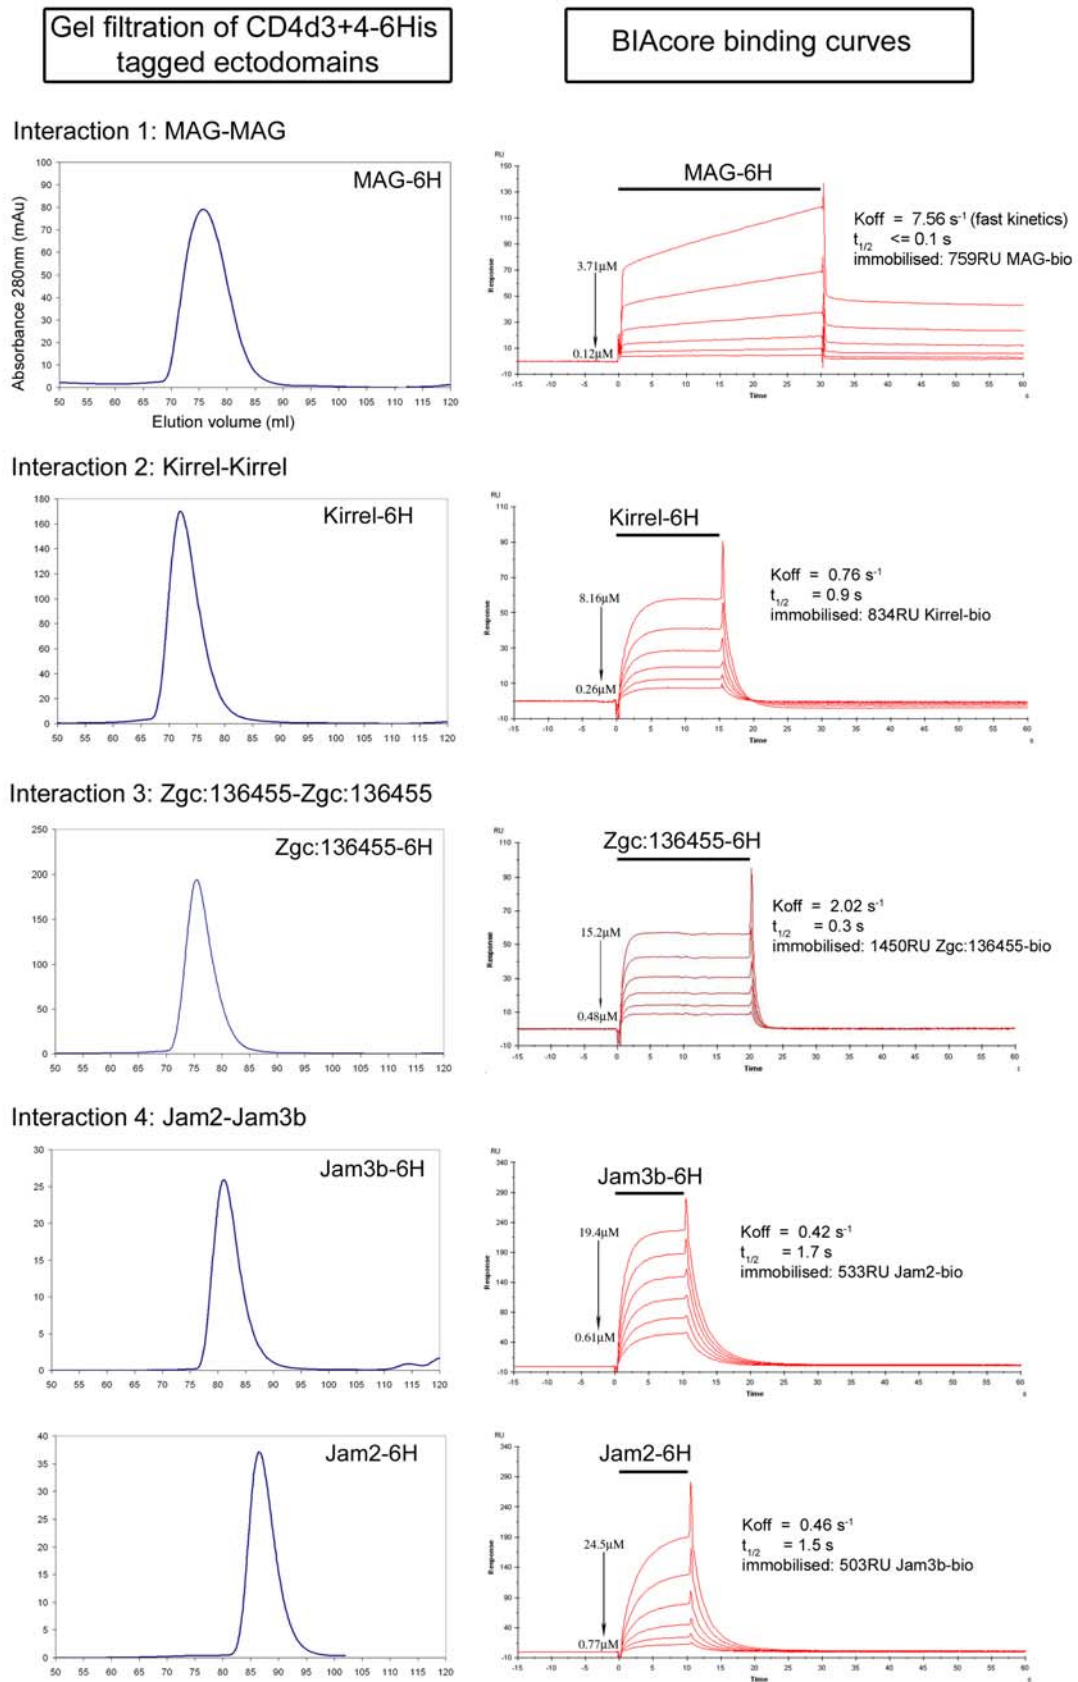

Figure S1.2

Interaction 5: Mpzl2-Mpzl3

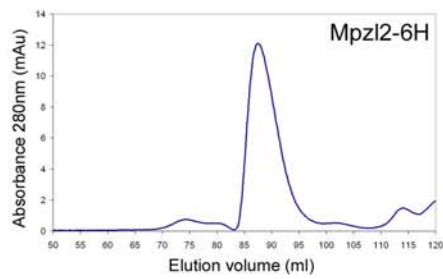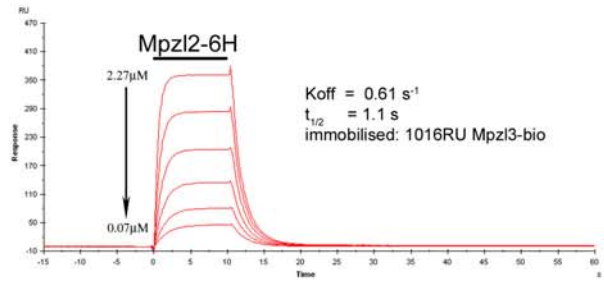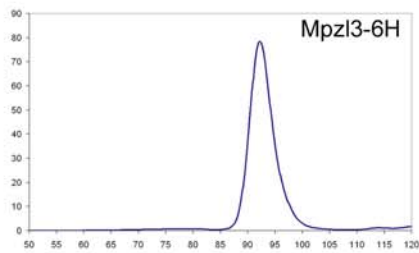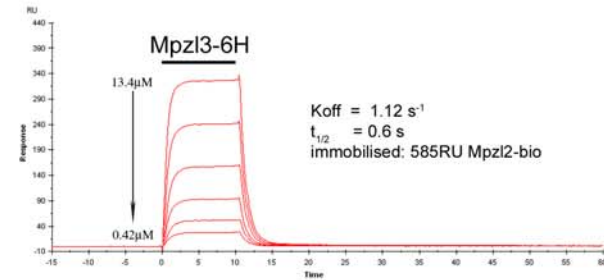

Interaction 6: Mpzl3-Cssl:d179

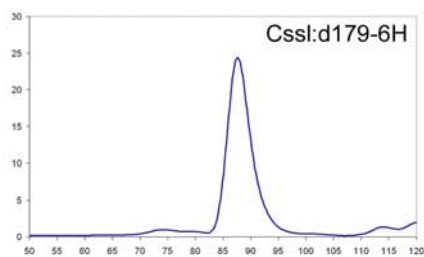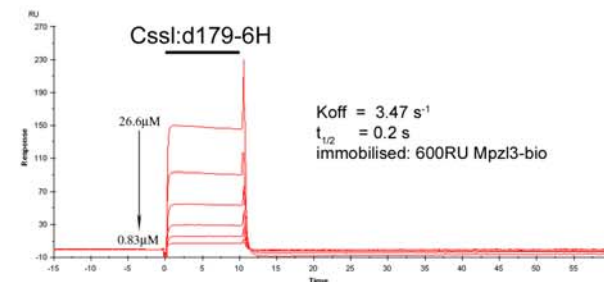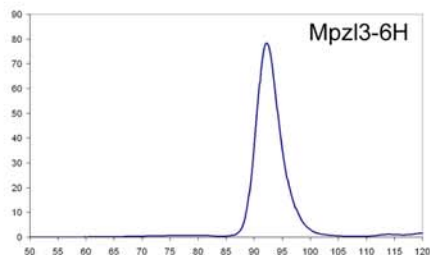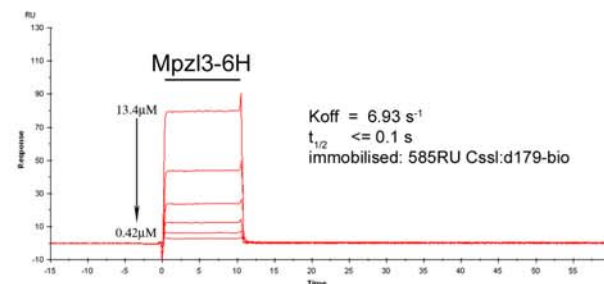

Interaction 7: Ncam1-Musk FL

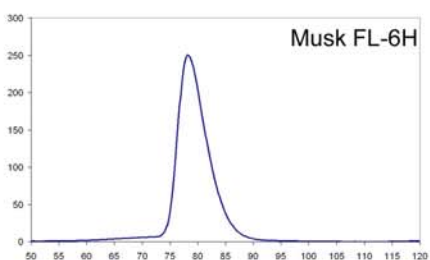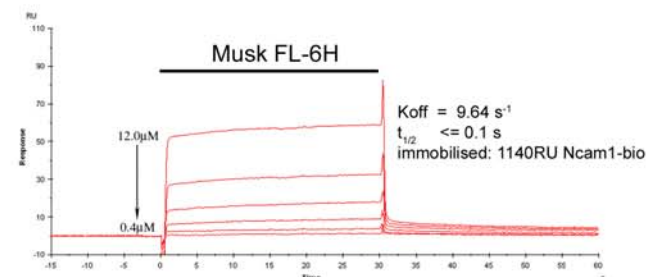

Figure S1.3

Interaction 8: Zgc:136455-Zgc:110372

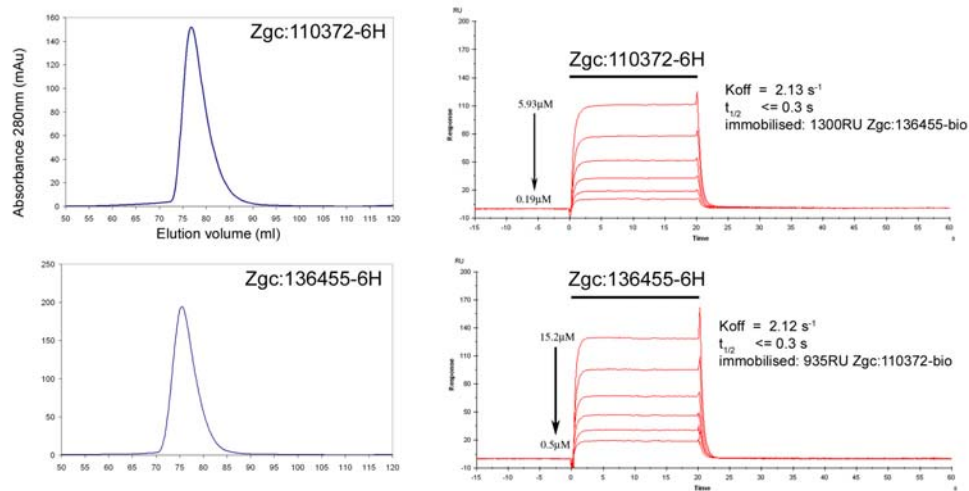

Interaction 9: Zgc:136455-Negr1

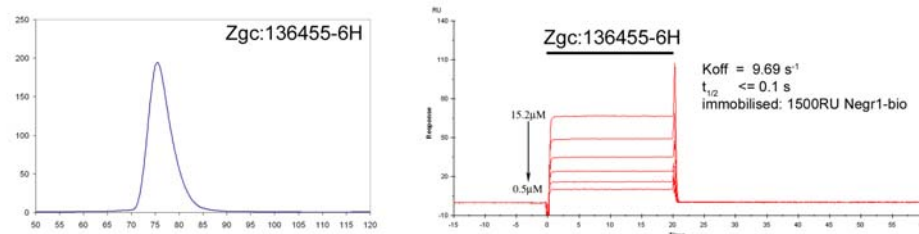

Interaction 10: Pdgfr1-Musk FL

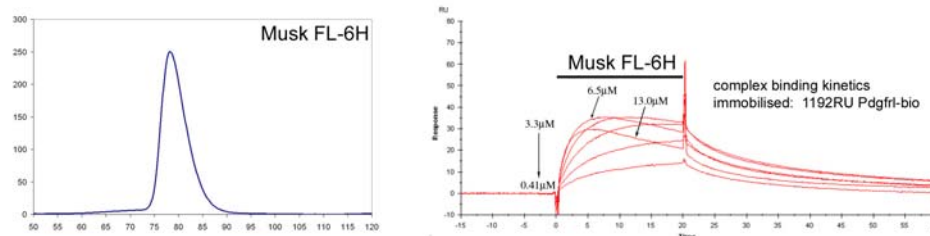

Interaction 15: Negr1-Zgc:110372

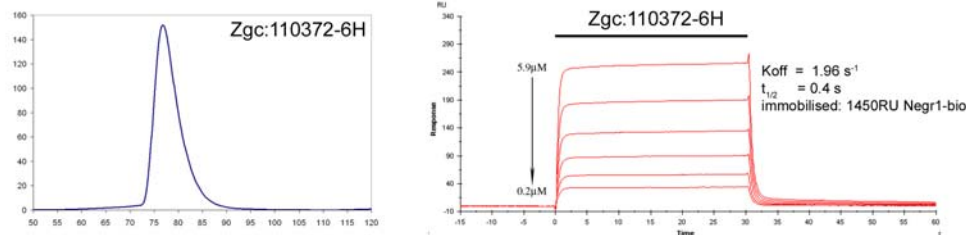

**Supplementary Figure S1. Interaction validation and quantification using surface plasmon resonance.** For each interaction, the gel filtration profile of the purified 6-His-tagged-protein injected is shown in the left panels and the reference-subtracted SPR traces in the right panels. The binding curves of six 2-fold serial dilutions of the purified protein are shown and the concentrations indicated. The wash out phase of the binding was fitted to a 1:1 dissociation model, and the off-rate constant ( $k_{off}$ ) was determined and a half-life calculated (see methods). Interaction 10 showed complex binding characteristics and so no kinetic parameters were calculated.
